# Supplementary material
Source: publisher site journal article supplement (https://www.dovepress.com/article/270669)
Supplement: Supplementary file 1 [file get_supplementary_file.php]

| **Supplementary Table 1.** Individual Test Raw Score Mean and Standard Deviations By Group Type | | | | | |
| --- | --- | --- | --- | --- | --- |
| Index | PD Executive  (n=24) | PD Memory  (n=35) | PD Cognitively Well  (n=54) | Non-PD  (n=60) | p-value |
| WAIS-III Letter-Number Sequencing (total score) | 8.21 ± 1.84 | 9.31 ± 2.59 | 10.87 ± 1.85 | 11.20 ± 2.02 | <.01 |
| WAIS-III Digit-Symbol Coding (total score) | 36.17 ± 9.94 | 51.66 ± 12.70 | 57.07 ± 11.32 | 62.85 ± 11.53 | <.01 |
| Stroop Color-Word (total score) | 36.12 ± 8.03 | 44.88 ± 9.54 | 49.31 ± 7.14 | 48.87 ± 8.07 | <.01 |
| Trail Making Test B (seconds) | 167.00 ± 68.90 | 99.99 ± 43.91 | 78.39 ± 22.69 | 73.70 ± 23.14 | <.01 |
| HVLT-R Delay (total words recalled) | 7.33 ± 2.99 | 5.37 ± 2.37 | 9.19 ± 2.26 | 9.12 ± 2.34 | <.01 |
| HVLT-R Recognition-Discrimination (true positive-false negative responses) | 10.50 ± 1.71 | 9.17 ± 1.64 | 11.06 ± 1.02 | 10.60 ± 1.09 | <.01 |
| WMS-III Logical Memory II (total score) | 24.42 ± 6.61 | 17.74 ± 5.93 | 27.72 ± 6.19 | 27.33 ± 7.39 | <.01 |
| **Validating Measures** | | | | | |
| WASI Matrix Reasoning (total score) | 18.33 ± 6.30 | 20.94 ± 6.12 | 24.13 ± 4.46 | 24.63 ± 4.64 | <.01 |
| D-KEFS Tower Test (total achievement score) | 15.50 ± 4.77 | 17.51 ± 3.09 | 17.13 ± 3.44 | 18.70 ± 3.29 | <.01 |
| PrVLT LDFR (total words recalled) | 7.33 ± 2.79 | 6.46 ± 2.67 | 9.13 ± 2.09 | 9.82 ± 2.10 | <.01 |
| All values reported as Mean±SD. Abbreviations in alphabetical order. D-KEFS=Delis-Kaplan Executive Function System; PrVLT LDFR=Philadelphia Repeatable Verbal Learning Test Long Delay Free Recall; WAIS-III=Wechsler Adult Intelligence Scale, Third Edition; WASI=Wechsler Abbreviated Scale of Intelligence; WMS-III=Wechsler Memory Scale. | | | | | |

| **Supplementary Table 2.** Demographic and health-related characteristics of study participants (n=173) | | | | | |
| --- | --- | --- | --- | --- | --- |
|  | **PD-\Executive Function**  n= 24 | **PD-**  **Memory Function**  n= 35 | **PD- Cognitively Well**  n= 54 | **Non-PD Controls**  n=60 | ***Probability*** |
| Age (yrs) | 69.7 ± 5.8 | 66.5 ± 6.0 | 68.8 ± 6.3 | 68.3 ± 5.4 | 0.169 |
| Sex (n,%)  Male  Female | 18, 76.0  6, 24.0 | 27, 75.8  8, 24.2 | 35, 64.2  19, 35.8 | 44, 71.7  17, 28.3 | 0.605 |
| **Education (yrs)** | **15.7 ± 2.3** | **16.2 ± 2.5** | **17.1 ± 2.5** | **17.3 ± 2.2** | **0.022** |
| **Geriatric Depression Scale** | **7.3 ± 5.0** | **5.0 ± 5.2** | **4.2 ± 4.5** | **2.9 ± 4.7** | **0.002** |
| Charlson Comorbidity Scale | 0.4 ± 0.6 | 0.2 ± 0.4 | 0.4 ± 0.7 | 0.3 ± 0.6 | 0.394**#** |
| UPDRS Part I | 2.8 ± 2.1 | 1.9 ± 1.5 | 1.7 ± 1.7 | 0.6 ± 0.8 | 0.103**#*** |
| **UPDRS Part II** | **12.2 ± 6.1** | **9.1 ± 5.1** | **8.4 ± 4.8** | **0.4 ± 0.8** | **0.027#*** |
| UPDRS Part III | 22.0 ± 8.6 | 22.3 ± 10.9 | 18.1 ± 10.6 | 4.3 ± 4.7 | 0.080**#*** |
| **Disease Duration (yrs)** | **9.1 ± 7.0** | **5.7 ± 3.2** | **6.7 ± 4.4** | **-** | **0.028** |
| Levodopa Equivalence Score | 664 ± 381 | 649 ± 417 | 666 ± 280 | - | 0.975 |
| Anticholinergic Score | 0.8 ± 1.4 | 0.7 ± 1.12 | 0.9 ± 1.1.2 | 0.2 ± 0.8 | .001 |
| Values presented as Mean ± SD.  UPDRS=Unified Parkinson’s Disease Rating Scale. UPDRS analysis is p-value when comparing PD phenotypes.  **#** Kruskal-Wallis analysis of variance tests were used for Charlson Comorbidity Scale and UPDRS III scores due to their lack of normality  *p-value for comparison between PD phenotypes only | | | | | |

| **Supplementary Table 3.** BPI pain severity and interference subscales and individual items across cognitive phenotypes. |
| --- |

|  | **PD Executive**  **(n = 24)** | **PD Memory**  **(n = 35)** | **PD Cognitively Well (n = 54)** | **Non-PD**  **(n = 60)** |
| --- | --- | --- | --- | --- |
| **BPI Severity, Mean ± SD** | **2.4±2.1** | **1.9±1.5** | **1.9±1.7** | **1.1±1.5** |
| Pain at its Worst | 3.5 ± 2.9 | 2.5 ± 2.4 | 3.1 ± 2.5 | 1.8 ± 2.3 |
| Pain at its Least | 1.7 ± 2.1 | 1.2 ± 1.6 | 1.0 ± 1.3 | 0.7 ± 1.3 |
| Pain on Average | 2.8 ± 2.3 | 2.4 ± 2.2 | 2.3 ± 1.9 | 1.2 ± 1.6 |
| Pain Right Now | 1.6 ± 2.2 | 1.3 ± 1.6 | 1.5 ± 1.8 | 0.8 ± 1.3 |
| **BPI Interference, Mean ± SD** | **2.8±2.5** | **1.7±1.5** | **1.7±1.6** | **0.6±1.2** |
| General Activity | 3.0 ± 3.0 | 1.8 ± 2.2 | 1.8 ± 2.0 | 0.5 ± 1.1 |
| Mood | 2.9 ± 3.3 | 1.6 ± 2.0 | 1.2 ± 1.4 | 0.8 ± 1.4 |
| Walking ability | 3.3 ± 3.2 | 2.3 ± 2.5 | 2.2 ± 2.7 | 0.7 ± 1.6 |
| Normal Work Activity | 3.0 ± 2.9 | 1.9 ± 2.1 | 2.1 ± 2.2 | 0.7 ± 1.5 |
| Relating with People | 1.8 ± 2.1 | 1.0 ± 1.3 | 1.0 ± 1.5 | 0.4 ± 0.9 |
| Sleep | 2.8 ± 3.3 | 1.6 ± 1.5 | 1.6 ± 1.9 | 0.7 ± 1.5 |
| Enjoyment of everyday life | 2.7 ± 2.7 | 1.9 ± 2.1 | 1.7 ± 1.9 | 0.8 ± 1.8 |

| **Supplementary Table 4.** Analyses of covariance predicting pain severity and interference while accounting for important covariates. | | | | | | | |
| --- | --- | --- | --- | --- | --- | --- | --- |
| BPI: Pain Severity | Sum of Squares | Degrees of Freedom | Mean Square | F-value | *p-value* | ηp2 |
| Age | .504 | 1 | .504 | .196 | .659 | .001 |
| Sex | 8.393 | 1 | 8.393 | 3.265 | .073 | .020 |
| Years of Education | 6.704 | 1 | 6.704 | 2.608 | .108 | .016 |
| Disease Duration | 18.021 | 1 | 18.021 | 7.010 | .009 | .041 |
| UPDRS Part III | 1.510 | 1 | 1.510 | .587 | .445 | .004 |
| Cognitive Phenotypes | .425 | 3 | .142 | .055 | .983 | .001 |
| BPI: Pain Interference | Sum of Squares | Degrees of Freedom | Mean Square | F-value | *p-value* | ηp2 |
| Age | 1.111 | 1 | 1.111 | 1.073 | .302 | .007 |
| Sex | .485 | 1 | .485 | .469 | .495 | .003 |
| Years of Education | 4.095 | 1 | 4.095 | 3.955 | .048 | .024 |
| Disease Duration | .221 | 1 | .221 | .213 | .645 | .001 |
| UPDRS Part III | .000 | 1 | .000 | .000 | .991 | <.001 |
| BPI: Pain Severity | 229.482 | 1 | 229.482 | 221.603 | <.001 | .576 |
| Cognitive Phenotypes | 11.997 | 3 | 3.999 | 3.862 | .011 | .066 |
| BPI = Brief Pain Inventory;  UPDRS = Unified Parkinson’s Disease Rating Scale. | | | | | | | |

| **Supplementary Table 5.** Analyses of covariance comparing pain severity and interference across PD phenotypes and non-PD peers while also controlling for depressive symptoms. | | | | | | |
| --- | --- | --- | --- | --- | --- | --- |
| BPI: Pain Severity | SS | *df* | MS | F | *p-value* | ηp2 |
| Age | .737 | 1 | .737 | .314 | .576 | .002 |
| Sex | 9.513 | 1 | 9.513 | 3.733 | .055 | .022 |
| Years of Education | 7.265 | 1 | 7.265 | 2.851 | .093 | .017 |
| Disease Duration | 15.235 | 1 | 15.235 | 5.979 | .016 | .035 |
| UPDRS Part 3 | .694 | 1 | .694 | .272 | .602 | .002 |
| GDS Total | 6.253 | 1 | 6.253 | 2.454 | .119 | .015 |
| Cognitive Phenotypes | .124 | 3 | .041 | .016 | .997 | <.001 |
| BPI: Pain Interference | SS | *df* | MS | F | p-value |  |
| Age | 1.635 | 1 | 1.635 | 1.693 | .195 | .010 |
| Sex | .129 | 1 | .129 | .133 | .715 | .001 |
| Years of Education | 4.956 | 1 | 4.956 | 5.131 | .025 | .031 |
| Disease Duration | .658 | 1 | .658 | .681 | .411 | .004 |
| UPDRS Part 3 | .252 | 1 | .252 | .261 | .610 | .002 |
| BPI: Pain Intensity | 213.397 | 1 | 213.397 | 220.955 | <.001 | .577 |
| GDS Total | 12.337 | 1 | 12.337 | 12.774 | <.001 | .073 |
| Cognitive Phenotypes | 9.801 | 3 | 3.267 | 3.383 | .020 | .059 |
| BPI=Brief Pain Inventory; GDS=Geriatric Depression Scale; UPDRS=Unified Parkinson’s Disease Rating Scale. | | | | | | |
